# Supplementary material for: Impact of Upadacitinib on Laboratory Parameters and Related Adverse Events in Patients with RA: Integrated Data Up to 6.5 Years
Source: Springer Nature journal article supplement (doi:10.1007/s40744-023-00624-3), 2024-01-05
Supplement: MOESM1 [file 40744_2023_624_MOESM1_ESM.pdf]

# **Impact of Upadacitinib on Laboratory Parameters and Related Adverse Events in Patients with RA: Integrated Data Up to 6.5 Years**

Christina Charles-Schoeman<sup>1</sup> · Jon T. Giles<sup>2</sup> · Nancy E. Lane<sup>3</sup> · Ernest Choy<sup>4</sup> · Daniel E. Furst<sup>5</sup> · Jiří Vencovský<sup>6,7</sup> · Anthony G. Wilson<sup>8</sup> · Gerd R. Burmester<sup>9</sup> · Derek Coombs<sup>10</sup> · Sara K. Penn<sup>10</sup> · Nasser Khan<sup>10</sup> · Jillian B. Yee<sup>10</sup> · Kassim Rahawi<sup>10</sup> · Iain B. McInnes<sup>11</sup>

<sup>1</sup>University of California, Los Angeles, CA, USA; <sup>2</sup>Columbia University, New York, NY, USA; <sup>3</sup>University of California, Davis, Sacramento, CA, USA; <sup>4</sup>CREATE Centre, Cardiff University, Cardiff, UK; <sup>5</sup>Division of Rheumatology, David Geffen School of Medicine, University of California, Los Angeles, CA, USA; <sup>6</sup>Institute of Rheumatology, Prague, Czech Republic; <sup>7</sup>Department of Rheumatology, First Faculty of Medicine, Charles University, Prague, Czech Republic; <sup>8</sup>Center for Arthritis Research, Conway Institute, University College Dublin, Dublin, Ireland; <sup>9</sup>Charité – Universitätsmedizin Berlin, Berlin, Germany; <sup>10</sup>AbbVie Inc., North Chicago, IL, USA; <sup>11</sup>College of Medical, Veterinary, and Life Sciences, University of Glasgow, Glasgow, UK

**Corresponding author:** [Ccharles@mednet.ucla.edu](mailto:Ccharles@mednet.ucla.edu)

1000 Veteran Avenue, Rm 32-59, Los Angeles, CA 90095, USA

## ONLINE SUPPLEMENTARY APPENDIX

**Supplementary Fig. S1. Patients with Grade 3 and 4 changes in laboratory parameters by 12-month time intervals, respectively**

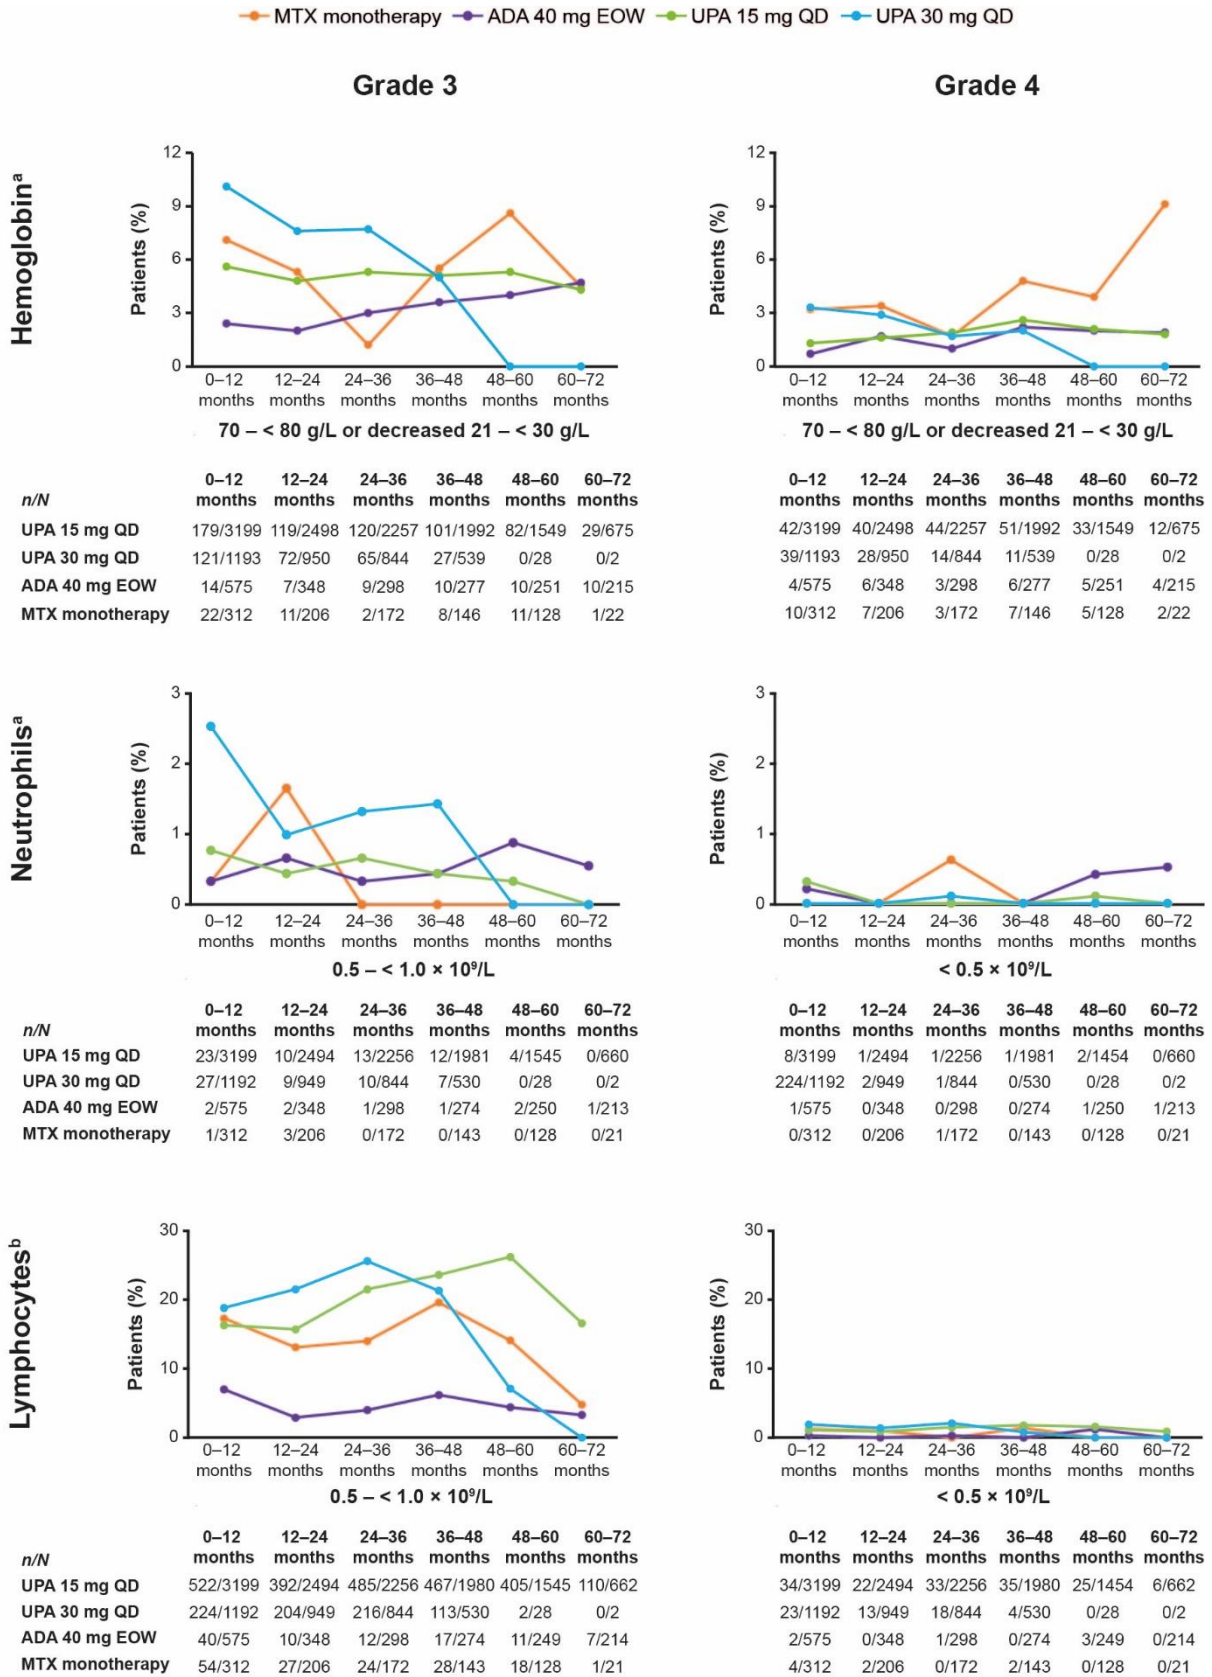

**ALT**

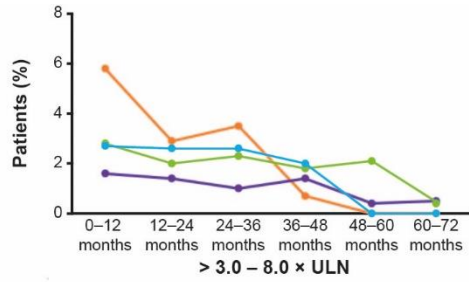

| n/N             | 0-12 months | 12-24 months | 24-36 months | 36-48 months | 48-60 months | 60-72 months |
|-----------------|-------------|--------------|--------------|--------------|--------------|--------------|
| UPA 15 mg QD    | 88/3197     | 49/2497      | 53/2257      | 35/1988      | 33/1551      | 3/662        |
| UPA 30 mg QD    | 32/1195     | 25/955       | 22/848       | 11/543       | 0/28         | 0/2          |
| ADA 40 mg EOW   | 9/576       | 5/350        | 3/298        | 4/277        | 1/250        | 1/217        |
| MTX monotherapy | 18/312      | 6/207        | 6/172        | 1/146        | 0/128        | 0/23         |

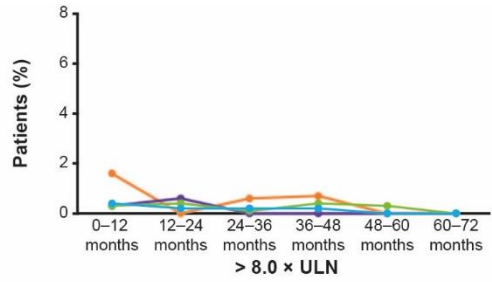

| n/N             | 0-12 months | 12-24 months | 24-36 months | 36-48 months | 48-60 months | 60-72 months |
|-----------------|-------------|--------------|--------------|--------------|--------------|--------------|
| UPA 15 mg QD    | 10/3197     | 11/2497      | 3/2257       | 7/1988       | 5/1551       | 0/682        |
| UPA 30 mg QD    | 5/1195      | 2/955        | 2/848        | 1/543        | 0/28         | 0/2          |
| ADA 40 mg EOW   | 2/576       | 2/350        | 0/298        | 0/277        | 0/250        | 0/217        |
| MTX monotherapy | 5/312       | 0/207        | 1/172        | 1/146        | 0/128        | 0/23         |

**AST**

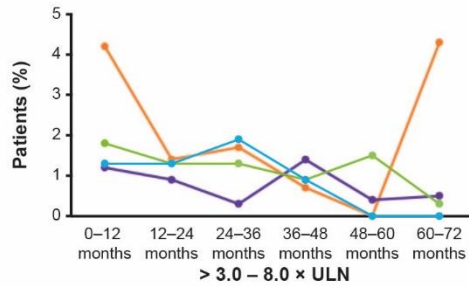

| n/N             | 0-12 months | 12-24 months | 24-36 months | 36-48 months | 48-60 months | 60-72 months |
|-----------------|-------------|--------------|--------------|--------------|--------------|--------------|
| UPA 15 mg QD    | 57/3197     | 32/2495      | 26/2257      | 17/1987      | 23/1551      | 2/690        |
| UPA 30 mg QD    | 15/1196     | 12/955       | 13/847       | 5/541        | 0/26         | 0/2          |
| ADA 40 mg EOW   | 7/576       | 3/350        | 0/298        | 4/277        | 1/250        | 1/218        |
| MTX monotherapy | 13/312      | 1/206        | 3/172        | 1/146        | 0/128        | 1/23         |

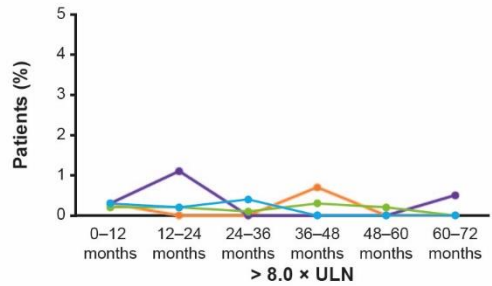

| n/N             | 0-12 months | 12-24 months | 24-36 months | 36-48 months | 48-60 months | 60-72 months |
|-----------------|-------------|--------------|--------------|--------------|--------------|--------------|
| UPA 15 mg QD    | 7/3197      | 6/2495       | 3/2257       | 6/1987       | 3/1551       | 0/690        |
| UPA 30 mg QD    | 4/1995      | 2/955        | 3/848        | 0/541        | 0/26         | 0/2          |
| ADA 40 mg EOW   | 2/576       | 4/350        | 0/298        | 0/277        | 0/250        | 1/218        |
| MTX monotherapy | 1/312       | 0/207        | 0/172        | 1/146        | 0/128        | 0/23         |

**CPK<sup>b</sup>**

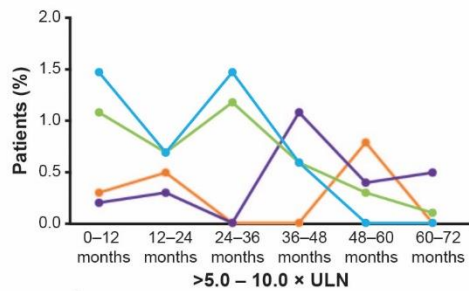

| n/N             | 0-12 months | 12-24 months | 24-36 months | 36-48 months | 48-60 months | 60-72 months |
|-----------------|-------------|--------------|--------------|--------------|--------------|--------------|
| UPA 15 mg QD    | 36/3197     | 18/2493      | 26/2257      | 11/1892      | 5/1456       | 1/683        |
| UPA 30 mg QD    | 18/1196     | 7/955        | 13/847       | 3/533        | 0/27         | 0/2          |
| ADA 40 mg EOW   | 1/576       | 1/347        | 0/298        | 3/277        | 1/250        | 1/216        |
| MTX monotherapy | 1/312       | 1/206        | 0/172        | 0/145        | 1/128        | 0/23         |

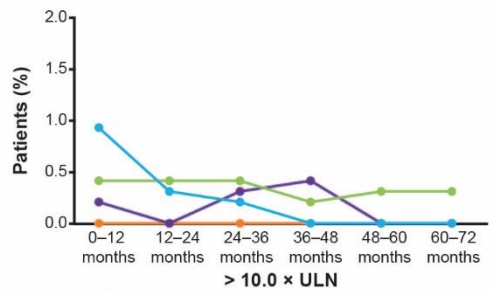

| n/N             | 0-12 months | 12-24 months | 24-36 months | 36-48 months | 48-60 months | 60-72 months |
|-----------------|-------------|--------------|--------------|--------------|--------------|--------------|
| UPA 15 mg QD    | 12/3197     | 10/2493      | 10/2257      | 3/1982       | 5/1546       | 2/683        |
| UPA 30 mg QD    | 11/1966     | 3/955        | 2/847        | 0/533        | 0/27         | 0/2          |
| ADA 40 mg EOW   | 1/576       | 0/347        | 1/298        | 1/277        | 0/250        | 0/216        |
| MTX monotherapy | 0/312       | 0/206        | 0/172        | 0/145        | 0/128        | 0/22         |

**Creatinine<sup>b</sup>**

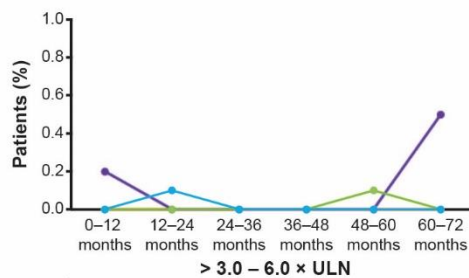

| n/N             | 0-12 months | 12-24 months | 24-36 months | 36-48 months | 48-60 months | 60-72 months |
|-----------------|-------------|--------------|--------------|--------------|--------------|--------------|
| UPA 15 mg QD    | 1/3197      | 1/2499       | 0/2257       | 0/1989       | 2/1551       | 0/691        |
| UPA 30 mg QD    | 1/1197      | 1/956        | 0/848        | 0/543        | 0/27         | 0/2          |
| ADA 40 mg EOW   | 1/576       | 0/349        | 0/298        | 0/277        | 0/250        | 1/218        |
| MTX monotherapy | 0/312       | 0/206        | 0/172        | 0/146        | 0/128        | 0/23         |

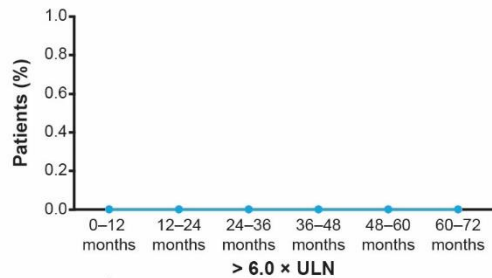

| n/N             | 0-12 months | 12-24 months | 24-36 months | 36-48 months | 48-60 months | 60-72 months |
|-----------------|-------------|--------------|--------------|--------------|--------------|--------------|
| UPA 15 mg QD    | 1/3197      | 2/2499       | 1/2257       | 1/1989       | 1/1551       | 0/691        |
| UPA 30 mg QD    | 0/1197      | 0/956        | 0/848        | 0/543        | 0/27         | 0/2          |
| ADA 40 mg EOW   | 0/576       | 0/349        | 0/298        | 0/277        | 0/250        | 0/218        |
| MTX monotherapy | 0/312       | 0/206        | 0/172        | 0/146        | 0/128        | 0/23         |

<sup>a</sup>Toxicity grading scale is based on OMERACT criteria. Post-baseline Grade must be higher than baseline Grade. <sup>b</sup>National Cancer Institute standard common terminology criteria grading methodology was used. Post-baseline Grade must be higher than baseline Grade

*ACPA* anti-cyclic citrullinated protein antibody, *ADA* adalimumab, *BMI* body mass index, *CPK* creatine phosphokinase, *CV* cardiovascular, *EOW* every other week, *L* liter, *MTX* methotrexate, *OR* odds ratio, *QD* once daily, *RF* rheumatoid factor, *ULN* upper limit of normal, *UPA* upadacitinib

**Supplementary Fig. S2. Patients with Grade 3 and Grade 4 levels by 12-week time intervals through 60 weeks**

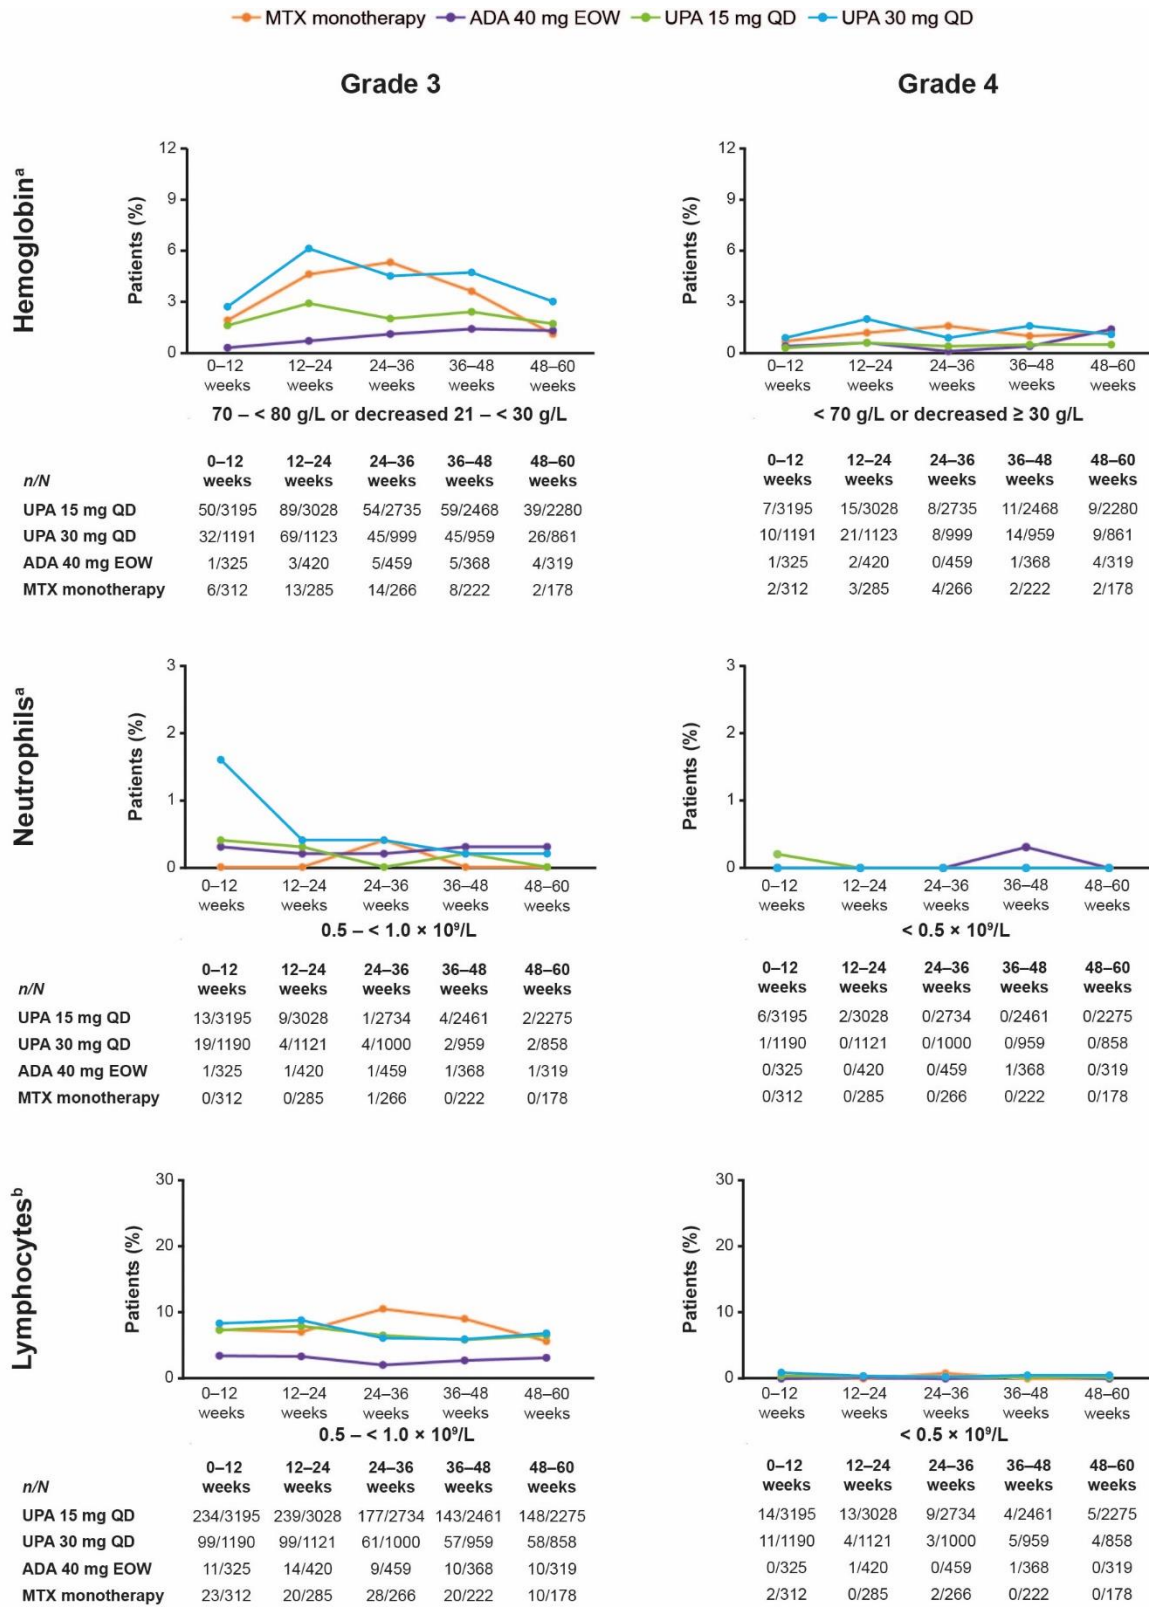



**ALT**

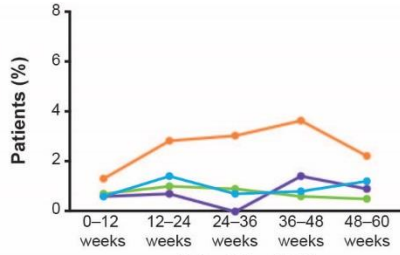

**> 3.0 - 8.0 × ULN**

| n/N             | 0-12 weeks | 12-24 weeks | 24-36 weeks | 36-48 weeks | 48-60 weeks |
|-----------------|------------|-------------|-------------|-------------|-------------|
| UPA 15 mg QD    | 23/3193    | 30/3031     | 26/2738     | 16/2477     | 12/2294     |
| UPA 30 mg QD    | 7/1193     | 16/1125     | 7/1003      | 8/956       | 10/862      |
| ADA 40 mg EOW   | 2/326      | 3/420       | 0/461       | 5/368       | 3/321       |
| MTX monotherapy | 4/312      | 8/286       | 8/267       | 8/222       | 4/179       |

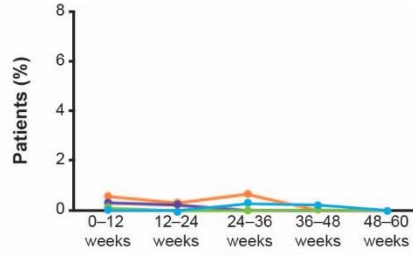

**> 8.0 × ULN**

| n/N             | 0-12 weeks | 12-24 weeks | 24-36 weeks | 36-48 weeks | 48-60 weeks |
|-----------------|------------|-------------|-------------|-------------|-------------|
| UPA 15 mg QD    | 4/3193     | 3/3031      | 2/2738      | 1/2477      | 1/2294      |
| UPA 30 mg QD    | 0/1193     | 1/1125      | 3/1003      | 2/956       | 0/862       |
| ADA 40 mg EOW   | 1/326      | 1/420       | 0/461       | 0/368       | 0/321       |
| MTX monotherapy | 2/312      | 1/286       | 2/267       | 0/222       | 0/179       |

**AST**

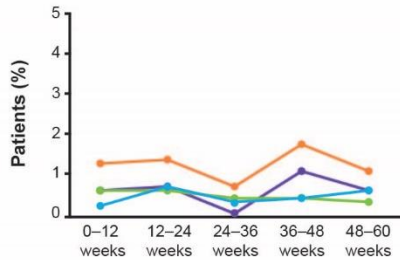

**> 3.0 - 8.0 × ULN**

| n/N             | 0-12 weeks | 12-24 weeks | 24-36 weeks | 36-48 weeks | 48-60 weeks |
|-----------------|------------|-------------|-------------|-------------|-------------|
| UPA 15 mg QD    | 18/3193    | 19/3030     | 12/2735     | 10/2468     | 6/2283      |
| UPA 30 mg QD    | 2/1192     | 8/1123      | 3/1002      | 4/956       | 5/859       |
| ADA 40 mg EOW   | 2/326      | 3/420       | 0/461       | 4/367       | 2/321       |
| MTX monotherapy | 4/312      | 4/286       | 2/267       | 4/222       | 2/178       |

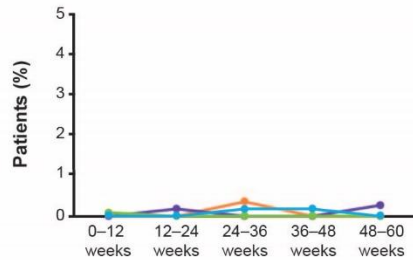

**> 8.0 × ULN**

| n/N             | 0-12 weeks | 12-24 weeks | 24-36 weeks | 36-48 weeks | 48-60 weeks |
|-----------------|------------|-------------|-------------|-------------|-------------|
| UPA 15 mg QD    | 4/3193     | 2/3030      | 1/2735      | 0/2468      | 1/2283      |
| UPA 30 mg QD    | 0/1192     | 0/1123      | 2/1002      | 2/956       | 0/859       |
| ADA 40 mg EOW   | 0/326      | 1/420       | 0/461       | 0/367       | 1/321       |
| MTX monotherapy | 0/312      | 0/286       | 1/267       | 0/222       | 0/178       |

**CPK<sup>b</sup>**

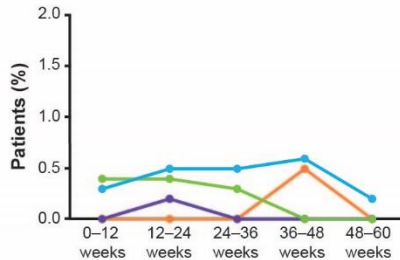

**> 5.0 - 10.0 × ULN**

| n/N             | 0-12 weeks | 12-24 weeks | 24-36 weeks | 36-48 weeks | 48-60 weeks |
|-----------------|------------|-------------|-------------|-------------|-------------|
| UPA 15 mg QD    | 14/3193    | 13/3031     | 7/2734      | 2/2468      | 2/2278      |
| UPA 30 mg QD    | 3/1194     | 6/1123      | 5/998       | 6/954       | 2/864       |
| ADA 40 mg EOW   | 0/326      | 1/420       | 0/461       | 0/368       | 0/318       |
| MTX monotherapy | 0/312      | 0/286       | 0/266       | 1/222       | 0/177       |

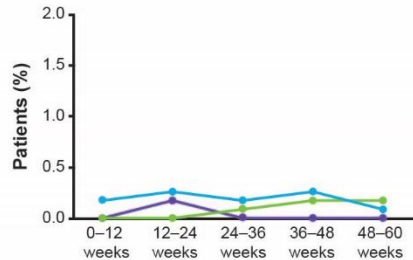

**> 10.0 × ULN**

| n/N             | 0-12 weeks | 12-24 weeks | 24-36 weeks | 36-48 weeks | 48-60 weeks |
|-----------------|------------|-------------|-------------|-------------|-------------|
| UPA 15 mg QD    | 3/3193     | 3/3031      | 3/2734      | 4/2468      | 4/2278      |
| UPA 30 mg QD    | 2/1194     | 3/1123      | 2/998       | 3/954       | 1/864       |
| ADA 40 mg EOW   | 0/326      | 1/420       | 0/461       | 0/368       | 0/318       |
| MTX monotherapy | 0/312      | 0/286       | 0/266       | 0/222       | 0/177       |

**Creatinine<sup>b</sup>**

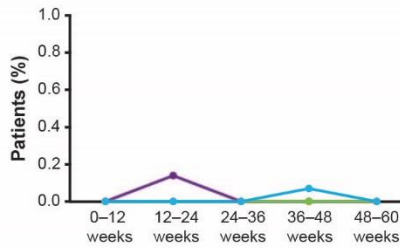

**> 3.0 - 6.0 × ULN**

| n/N             | 0-12 weeks | 12-24 weeks | 24-36 weeks | 36-48 weeks | 48-60 weeks |
|-----------------|------------|-------------|-------------|-------------|-------------|
| UPA 15 mg QD    | 0/3194     | 1/3031      | 0/2744      | 0/2480      | 0/2297      |
| UPA 30 mg QD    | 0/1196     | 0/1126      | 0/1003      | 1/958       | 0/862       |
| ADA 40 mg EOW   | 0/326      | 1/420       | 0/462       | 0/368       | 0/321       |
| MTX monotherapy | 0/312      | 0/286       | 0/267       | 0/222       | 0/178       |

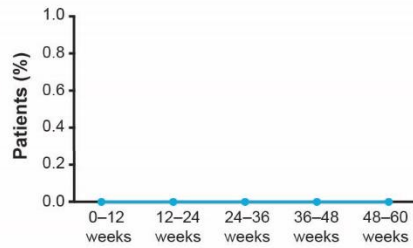

**> 6.0 × ULN**

| n/N             | 0-12 weeks | 12-24 weeks | 24-36 weeks | 36-48 weeks | 48-60 weeks |
|-----------------|------------|-------------|-------------|-------------|-------------|
| UPA 15 mg QD    | 0/3194     | 1/3031      | 0/2744      | 0/2480      | 0/2297      |
| UPA 30 mg QD    | 0/1196     | 0/1126      | 0/1003      | 0/958       | 0/862       |
| ADA 40 mg EOW   | 0/326      | 0/420       | 0/462       | 0/368       | 0/321       |
| MTX monotherapy | 0/312      | 0/286       | 0/267       | 0/222       | 0/178       |

<sup>a</sup>Toxicity grading scale is based on OMERACT criteria. Post-baseline Grade must be higher than baseline Grade. <sup>b</sup>National Cancer Institute standard common terminology criteria grading methodology was used. Post-baseline Grade must be higher than baseline Grade

*ACPA* anti-cyclic citrullinated protein antibody, *ADA* adalimumab, *BMI* body mass index, *CPK* creatine phosphokinase, *CV* cardiovascular, *EOW* every other week, *L* liter, *MTX* methotrexate, *OR* odds ratio, *QD* once daily, *RF* rheumatoid factor, *ULN* upper limit of normal, *UPA* upadacitinib



**Supplementary Table. S1.** Overview of the SELECT phase 3 clinical program for upadacitinib<sup>a</sup>

| Study                                      | SELECT-<br>EARLY                                         | SELECT-<br>NEXT               | SELECT-<br>MONOTHERAPY        | SELECT-<br>COMPARE            | SELECT-<br>BEYOND             | SELECT-<br>CHOICE             |
|--------------------------------------------|----------------------------------------------------------|-------------------------------|-------------------------------|-------------------------------|-------------------------------|-------------------------------|
| <b>Patients</b>                            | MTX-naïve                                                | csDMARD-IR                    | MTX-IR                        | MTX-IR                        | bDMARD-IR                     | bDMARD-IR                     |
| <b>Patients randomized</b>                 | 947                                                      | 661                           | 648                           | 1629                          | 499                           | 613                           |
| <b>Treatment groups</b>                    | UPA 7.5 mg <sup>b</sup><br>UPA 15 mg<br>UPA 30 mg<br>MTX | UPA 15 mg<br>UPA 30 mg<br>PBO | UPA 15 mg<br>UPA 30 mg<br>MTX | UPA 15 mg<br>ADA 40 mg<br>PBO | UPA 15 mg<br>UPA 30 mg<br>PBO | UPA 15 mg<br>ABA <sup>c</sup> |
| <b>Background treatment</b>                | —                                                        | csDMARDs                      | —                             | MTX                           | csDMARDs                      | csDMARDs                      |
| <b>Duration of study</b>                   | 5 years                                                  | 5 years                       | 5 years                       | 10 years                      | 5 years                       | 5 years                       |
| <b>ANALYSIS SET<sup>d,e</sup></b>          |                                                          |                               |                               |                               |                               |                               |
| <b>MTX monotherapy (N = 314)</b>           | ✓                                                        | —                             | —                             | —                             | —                             | —                             |
| <b>ADA 40 mg EOW + MTX (N = 579)</b>       | —                                                        | —                             | —                             | ✓                             | —                             | —                             |
| <b>UPA 15 mg QD (N = 3209)</b>             | ✓                                                        | ✓                             | ✓                             | ✓                             | ✓                             | ✓                             |
| <b>UPA 30 mg QD (N = 1204)<sup>f</sup></b> | ✓                                                        | ✓                             | ✓                             | —                             | ✓                             | —                             |

<sup>a</sup>Table adapted from Kakehasi A, et al. Clin Rheumatol 2023;42:1249–58. <sup>b</sup>Japanese patients only. <sup>c</sup>All patients receiving ABA switched to UPA 15 mg QD at 24 weeks, therefore long-term data are not available for this treatment group. Intravenous ABA was administered at day 1 and weeks 2, 4, 8, 12, 16, and 20

(500 mg in patients with a body weight of < 60 kg, 750 mg in those with a weight of 60 to 100 kg, and 1000 mg in those with a weight of > 100 kg). <sup>d</sup>Cut-off date was August 15, 2022. <sup>e</sup>Tick mark indicates inclusion in the analysis set. <sup>f</sup>Following a protocol amendment due to the approval of the upadacitinib 15 mg dose, patients receiving upadacitinib 30 mg were switched to the 15 mg dose (earliest switch at week 108 [SELECT-EARLY]/168 [SELECT-NEXT]/132 [SELECT-MONOTHERAPY]/180 [SELECT-BEYOND])

*ABA* abatacept, *ADA* adalimumab, *bDMARD* biologic disease-modifying antirheumatic drug, *csDMARD* conventional synthetic disease-modifying antirheumatic drug, *EOW* every other week, *IR* inadequate responder, *MTX* methotrexate, *PBO* placebo, *PY* patient-years, *QD* once daily, *RA* rheumatoid arthritis, *UPA* upadacitinib
